# Supplementary material
Source: MDPI journal article supplement (https://www.mdpi.com/1996-1073/13/1/117)
Supplement: s1 [file s1]

## Supplementary Material

**Table S1.** Mid-point indicators (CML-IA baseline V3.05) for the three scenarios (electricity from grid).

| Indicator                        | Units                                 | Scenario              |                       |       |                       |        |
|----------------------------------|---------------------------------------|-----------------------|-----------------------|-------|-----------------------|--------|
|                                  |                                       | BAS, grid             | SH-TES, grid          |       | PCM-TES, grid         |        |
| Abiotic depletion                | kgSbe/kWh                             | $4.92 \times 10^{-7}$ | $4.55 \times 10^{-7}$ | −7.5% | $5.31 \times 10^{-7}$ | 7.8%   |
| Abiotic depletion (fossil fuels) | MJ/kWh                                | 1.62                  | 1.62                  | 0.0%  | 1.60                  | −1.0%  |
| Global warming                   | kgCO <sub>2</sub> e/kWh               | $1.30 \times 10^{-1}$ | $1.32 \times 10^{-1}$ | 1.6%  | $1.08 \times 10^{-1}$ | −16.6% |
| Ozone layer depletion (ODP)      | kgCFC-11e/kWh                         | $2.79 \times 10^{-8}$ | $2.81 \times 10^{-8}$ | 0.5%  | $2.52 \times 10^{-8}$ | −9.7%  |
| Human toxicity                   | kg1,4-DBe/kWh                         | $7.18 \times 10^{-2}$ | $6.73 \times 10^{-2}$ | −6.2% | $7.86 \times 10^{-2}$ | 9.4%   |
| Fresh water aquatic ecotox.      | kg1,4-DBe/kWh                         | $8.46 \times 10^{-2}$ | $8.99 \times 10^{-2}$ | 6.3%  | $7.76 \times 10^{-2}$ | −8.2%  |
| Marine aquatic ecotoxicity       | kg1,4-DBe/kWh                         | $1.47 \times 10^2$    | $1.50 \times 10^2$    | 1.9%  | $1.37 \times 10^2$    | −7.4%  |
| Terrestrial ecotoxicity          | kg1,4-DBe/kWh                         | $1.01 \times 10^{-3}$ | $1.05 \times 10^{-3}$ | 4.3%  | $9.15 \times 10^{-4}$ | −9.5%  |
| Photochemical oxidation          | kgC <sub>2</sub> H <sub>4</sub> e/kWh | $3.07 \times 10^{-5}$ | $3.05 \times 10^{-5}$ | −0.8% | $2.46 \times 10^{-5}$ | −19.9% |
| Acidification                    | kgSO <sub>2</sub> e/kWh               | $7.28 \times 10^{-4}$ | $7.43 \times 10^{-4}$ | 2.0%  | $6.20 \times 10^{-4}$ | −14.8% |
| Eutrophication                   | kgPO <sub>4</sub> <sup>3−</sup> e/kWh | $2.37 \times 10^{-4}$ | $2.39 \times 10^{-4}$ | 1.2%  | $2.09 \times 10^{-4}$ | −11.8% |

**Table S2.** Mid-point indicators (CML-IA baseline V3.05) for the three scenarios (electricity from PV).

| Indicator                        | Units                                 | Scenario              |                       |        |                       |        |                       |        |
|----------------------------------|---------------------------------------|-----------------------|-----------------------|--------|-----------------------|--------|-----------------------|--------|
|                                  |                                       | BAS, PV               | SH-TES, PV            |        | PCM-TES, PV           |        | Optimal, PV           |        |
| Abiotic depletion                | kgSbe/kWh                             | $1.13 \times 10^{-6}$ | $1.13 \times 10^{-6}$ | −0.1%  | $1.05 \times 10^{-6}$ | −6.9%  | $9.92 \times 10^{-7}$ | −12.1% |
| Abiotic depletion (fossil fuels) | MJ/kWh                                | $4.14 \times 10^{-1}$ | $3.45 \times 10^{-1}$ | −16.8% | $6.17 \times 10^{-1}$ | 49.1%  | $2.75 \times 10^{-1}$ | −33.6% |
| Global warming                   | kgCO <sub>2</sub> e/kWh               | $3.56 \times 10^{-2}$ | $3.23 \times 10^{-2}$ | −9.3%  | $3.12 \times 10^{-2}$ | −12.2% | $2.80 \times 10^{-2}$ | −21.3% |
| Ozone layer depletion (ODP)      | kgCFC-11e/kWh                         | $1.46 \times 10^{-8}$ | $1.40 \times 10^{-8}$ | −4.3%  | $1.43 \times 10^{-8}$ | −1.9%  | $1.41 \times 10^{-8}$ | −3.5%  |
| Human toxicity                   | kg1,4-DBe/kWh                         | $6.25 \times 10^{-2}$ | $5.75 \times 10^{-2}$ | −8.0%  | $7.10 \times 10^{-2}$ | 13.5%  | $6.09 \times 10^{-2}$ | −2.6%  |
| Fresh water aquatic ecotox.      | kg1,4-DBe/kWh                         | $5.23 \times 10^{-2}$ | $5.58 \times 10^{-2}$ | 6.6%   | $5.13 \times 10^{-2}$ | −2.0%  | $4.70 \times 10^{-2}$ | −10.2% |
| Marine aquatic ecotoxicity       | kg1,4-DBe/kWh                         | $8.96 \times 10^1$    | $8.91 \times 10^1$    | −0.7%  | $8.93 \times 10^1$    | −0.4%  | $7.95 \times 10^1$    | −11.3% |
| Terrestrial ecotoxicity          | kg1,4-DBe/kWh                         | $1.30 \times 10^{-4}$ | $1.23 \times 10^{-4}$ | −5.3%  | $1.95 \times 10^{-4}$ | 49.7%  | $1.50 \times 10^{-4}$ | 15.8%  |
| Photochemical oxidation          | kgC <sub>2</sub> H <sub>4</sub> e/kWh | $1.22 \times 10^{-5}$ | $1.09 \times 10^{-5}$ | −10.8% | $9.48 \times 10^{-6}$ | −22.5% | $8.52 \times 10^{-6}$ | −30.3% |
| Acidification                    | kgSO <sub>2</sub> e/kWh               | $2.09 \times 10^{-4}$ | $1.94 \times 10^{-4}$ | −7.2%  | $1.95 \times 10^{-4}$ | −6.4%  | $1.60 \times 10^{-4}$ | −23.2% |
| Eutrophication                   | kgPO <sub>4</sub> <sup>3−</sup> e/kWh | $1.10 \times 10^{-4}$ | $1.05 \times 10^{-4}$ | −4.1%  | $1.05 \times 10^{-4}$ | −4.4%  | $9.40 \times 10^{-5}$ | −14.3% |

**Table S3.** Incidence of most-impacting processes (BAS, grid).

| Process                          | Global Warming | Photochemical Oxidation | Acidification | Eutrophication |
|----------------------------------|----------------|-------------------------|---------------|----------------|
| Electricity, grid                | 87.85%         | 82.45%                  | 88.32%        | 82.85%         |
| Heat pump                        | 4.12%          | 5.80%                   | 4.88%         | 9.84%          |
| Propylene glycol                 | 1.86%          | 3.79%                   | 1.39%         | 2.43%          |
| Gravel                           | 1.50%          | 2.06%                   | 1.58%         | 1.37%          |
| Polyethylene                     | 1.38%          | 1.81%                   | 0.83%         | 0.24%          |
| Concrete                         | 1.26%          | 0.69%                   | 0.64%         | 0.56%          |
| Sand                             | 0.74%          | 0.97%                   | 0.80%         | 0.63%          |
| Steel, chromium                  | 0.58%          | 0.79%                   | 0.55%         | 0.57%          |
| Reinforcing steel                | 0.38%          | 0.79%                   | 0.25%         | 0.41%          |
| Tube insulation                  | 0.16%          | 0.28%                   | 0.21%         | 0.15%          |
| Sealing tape                     | 0.07%          | 0.13%                   | 0.07%         | 0.08%          |
| Brass                            | 0.06%          | 0.40%                   | 0.42%         | 0.84%          |
| Excavation                       | 0.05%          | 0.04%                   | 0.06%         | 0.05%          |
| Tap water                        | 0.00%          | 0.00%                   | 0.00%         | 0.00%          |
| end-of-life concrete             | 0.00%          | 0.00%                   | 0.00%         | 0.00%          |
| end-of-life eps tank             | 0.00%          | 0.00%                   | 0.00%         | 0.00%          |
| end-of-life steel PCM            | 0.00%          | 0.00%                   | 0.00%         | 0.00%          |
| Electricity, PV                  | 0.00%          | 0.00%                   | 0.00%         | 0.00%          |
| Paraffin                         | 0.00%          | 0.00%                   | 0.00%         | 0.00%          |
| PE                               | 0.00%          | 0.00%                   | 0.00%         | 0.00%          |
| Polystyrene                      | 0.00%          | 0.00%                   | 0.00%         | 0.00%          |
| Steel and iron (waste treatment) | 0.00%          | 0.00%                   | 0.00%         | 0.00%          |
| Steel, low-alloyed               | 0.00%          | 0.00%                   | 0.00%         | 0.00%          |
| Waste reinforced concrete        | 0.00%          | 0.00%                   | 0.00%         | 0.00%          |

**Table S4.** Incidence of most-impacting processes (SH-TES, grid).

| Process                          | Global Warming | Photochemical Oxidation | Acidification | Eutrophication |
|----------------------------------|----------------|-------------------------|---------------|----------------|
| Electricity, grid                | 91.41%         | 87.92%                  | 91.52%        | 86.57%         |
| Heat pump                        | 4.05%          | 5.85%                   | 4.78%         | 9.72%          |
| Propylene glycol                 | 0.63%          | 1.32%                   | 0.47%         | 0.83%          |
| Gravel                           | 0.74%          | 1.04%                   | 0.78%         | 0.68%          |
| Polyethylene                     | 0.47%          | 0.63%                   | 0.28%         | 0.08%          |
| Concrete                         | 0.95%          | 0.53%                   | 0.48%         | 0.42%          |
| Sand                             | 0.37%          | 0.49%                   | 0.39%         | 0.31%          |
| Steel, chromium                  | 0.57%          | 0.80%                   | 0.54%         | 0.56%          |
| Reinforcing steel                | 0.38%          | 0.81%                   | 0.25%         | 0.42%          |
| Tube insulation                  | 0.16%          | 0.28%                   | 0.21%         | 0.14%          |
| Sealing tape                     | 0.07%          | 0.14%                   | 0.07%         | 0.08%          |
| Brass                            | 0.00%          | 0.00%                   | 0.00%         | 0.00%          |
| Excavation                       | 0.07%          | 0.07%                   | 0.10%         | 0.07%          |
| Tap water                        | 0.02%          | 0.02%                   | 0.01%         | 0.02%          |
| end-of-life concrete             | 0.00%          | 0.00%                   | 0.00%         | 0.00%          |
| end-of-life eps tank             | 0.00%          | 0.00%                   | 0.00%         | 0.00%          |
| end-of-life steel PCM            | 0.00%          | 0.00%                   | 0.00%         | 0.00%          |
| Electricity, PV                  | 0.00%          | 0.00%                   | 0.00%         | 0.00%          |
| Paraffin                         | 0.00%          | 0.00%                   | 0.00%         | 0.00%          |
| PE                               | 0.00%          | 0.00%                   | 0.00%         | 0.00%          |
| Polystyrene                      | 0.00%          | 0.00%                   | 0.00%         | 0.00%          |
| Steel and iron (waste treatment) | 0.00%          | 0.00%                   | 0.00%         | 0.00%          |
| Steel, low-alloyed               | 0.00%          | 0.00%                   | 0.00%         | 0.00%          |
| Waste reinforced concrete        | 0.11%          | 0.11%                   | 0.13%         | 0.10%          |

**Table S5.** Incidence of most-impacting processes (PCM-TES, grid).

| Process                          | Global Warming | Photochemical Oxidation | Acidification | Eutrophication |
|----------------------------------|----------------|-------------------------|---------------|----------------|
| Electricity, grid                | 86.10%         | 84.18%                  | 84.79%        | 76.83%         |
| Heat pump                        | 4.94%          | 7.24%                   | 5.73%         | 11.16%         |
| Propylene glycol                 | 0.77%          | 1.63%                   | 0.56%         | 0.95%          |
| Gravel                           | 0.45%          | 0.64%                   | 0.46%         | 0.39%          |
| Polyethylene                     | 0.57%          | 0.78%                   | 0.34%         | 0.09%          |
| Concrete                         | 0.50%          | 0.29%                   | 0.25%         | 0.21%          |
| Sand                             | 0.22%          | 0.30%                   | 0.24%         | 0.18%          |
| Steel, chromium                  | 0.70%          | 0.99%                   | 0.65%         | 0.64%          |
| Reinforcing steel                | 0.19%          | 0.40%                   | 0.12%         | 0.19%          |
| Tube insulation                  | 0.19%          | 0.34%                   | 0.25%         | 0.17%          |
| Sealing tape                     | 0.09%          | 0.17%                   | 0.08%         | 0.09%          |
| Brass                            | 0.09%          | 0.66%                   | 0.66%         | 1.27%          |
| Excavation                       | 0.01%          | 0.01%                   | 0.02%         | 0.01%          |
| Tap water                        | 0.00%          | 0.00%                   | 0.00%         | 0.00%          |
| end-of-life concrete             | 0.00%          | 0.00%                   | 0.00%         | 0.00%          |
| end-of-life eps tank             | 0.00%          | 0.00%                   | 0.00%         | 0.00%          |
| end-of-life steel PCM            | 0.00%          | 0.00%                   | 0.00%         | 0.00%          |
| Electricity, PV                  | 0.00%          | 0.00%                   | 0.00%         | 0.00%          |
| Paraffin                         | 4.56%          | 5.33%                   | 5.57%         | 3.16%          |
| PE                               | −0.07%         | −0.10%                  | −0.03%        | 0.01%          |
| Polystyrene                      | 0.43%          | 0.29%                   | 0.13%         | 0.08%          |
| Steel and iron (waste treatment) | −4.11%         | −12.07%                 | −2.93%        | −2.65%         |
| Steel, low-alloyed               | 4.36%          | 8.91%                   | 3.14%         | 7.22%          |
| Waste reinforced concrete        | 0.00%          | 0.00%                   | 0.00%         | 0.00%          |

**Table S6.** Incidence of most-impacting processes (BAS, PV).

| Process                          | Global Warming | Photochemical Oxidation | Acidification | Eutrophication |
|----------------------------------|----------------|-------------------------|---------------|----------------|
| Electricity, PV                  | 55.65%         | 55.88%                  | 59.24%        | 63.01%         |
| Heat pump                        | 15.03%         | 14.58%                  | 17.02%        | 21.22%         |
| Propylene glycol                 | 6.78%          | 9.54%                   | 4.85%         | 5.23%          |
| Gravel                           | 5.46%          | 5.18%                   | 5.52%         | 2.95%          |
| Polyethylene                     | 5.05%          | 4.55%                   | 2.90%         | 0.53%          |
| Concrete                         | 4.60%          | 1.73%                   | 2.24%         | 1.20%          |
| Sand                             | 2.70%          | 2.44%                   | 2.80%         | 1.37%          |
| Steel, chromium                  | 2.12%          | 1.99%                   | 1.92%         | 1.22%          |
| Reinforcing steel                | 1.38%          | 1.98%                   | 0.86%         | 0.89%          |
| Tube insulation                  | 0.58%          | 0.69%                   | 0.73%         | 0.32%          |
| Sealing tape                     | 0.27%          | 0.34%                   | 0.24%         | 0.17%          |
| Brass                            | 0.21%          | 1.00%                   | 1.46%         | 1.80%          |
| Excavation                       | 0.17%          | 0.10%                   | 0.21%         | 0.10%          |
| Tap water                        | 0.00%          | 0.00%                   | 0.00%         | 0.00%          |
| end-of-life concrete             | 0.00%          | 0.00%                   | 0.00%         | 0.00%          |
| end-of-life eps tank             | 0.00%          | 0.00%                   | 0.00%         | 0.00%          |
| end-of-life steel PCM            | 0.00%          | 0.00%                   | 0.00%         | 0.00%          |
| Electricity, grid                | 0.00%          | 0.00%                   | 0.00%         | 0.00%          |
| Paraffin                         | 0.00%          | 0.00%                   | 0.00%         | 0.00%          |
| PE                               | 0.00%          | 0.00%                   | 0.00%         | 0.00%          |
| Polystyrene                      | 0.00%          | 0.00%                   | 0.00%         | 0.00%          |
| Steel and iron (waste treatment) | 0.00%          | 0.00%                   | 0.00%         | 0.00%          |
| Steel, low-alloyed               | 0.00%          | 0.00%                   | 0.00%         | 0.00%          |
| Waste reinforced concrete        | 0.00%          | 0.00%                   | 0.00%         | 0.00%          |

**Table S7.** Incidence of most-impacting processes (SH-TES, PV).

| Process                          | Global Warming | Photochemical Oxidation | Acidification | Eutrophication |
|----------------------------------|----------------|-------------------------|---------------|----------------|
| Electricity, PV                  | 64.89%         | 66.24%                  | 67.47%        | 69.45%         |
| Heat pump                        | 16.57%         | 16.34%                  | 18.34%        | 22.12%         |
| Propylene glycol                 | 2.58%          | 3.69%                   | 1.80%         | 1.88%          |
| Gravel                           | 3.02%          | 2.91%                   | 2.98%         | 1.54%          |
| Polyethylene                     | 1.91%          | 1.75%                   | 1.07%         | 0.19%          |
| Concrete                         | 3.90%          | 1.49%                   | 1.85%         | 0.96%          |
| Sand                             | 1.49%          | 1.37%                   | 1.51%         | 0.71%          |
| Steel, chromium                  | 2.33%          | 2.23%                   | 2.07%         | 1.28%          |
| Reinforcing steel                | 1.56%          | 2.27%                   | 0.95%         | 0.95%          |
| Tube insulation                  | 0.63%          | 0.78%                   | 0.79%         | 0.33%          |
| Sealing tape                     | 0.30%          | 0.38%                   | 0.26%         | 0.18%          |
| Brass                            | 0.00%          | 0.00%                   | 0.00%         | 0.00%          |
| Excavation                       | 0.30%          | 0.18%                   | 0.37%         | 0.16%          |
| Tap water                        | 0.06%          | 0.05%                   | 0.05%         | 0.04%          |
| end-of-life concrete             | 0.00%          | 0.00%                   | 0.00%         | 0.00%          |
| end-of-life eps tank             | 0.00%          | 0.00%                   | 0.00%         | 0.00%          |
| end-of-life steel PCM            | 0.00%          | 0.00%                   | 0.00%         | 0.00%          |
| Electricity, grid                | 0.00%          | 0.00%                   | 0.00%         | 0.00%          |
| Paraffin                         | 0.00%          | 0.00%                   | 0.00%         | 0.00%          |
| PE                               | 0.00%          | 0.00%                   | 0.00%         | 0.00%          |
| Polystyrene                      | 0.00%          | 0.00%                   | 0.00%         | 0.00%          |
| Steel and iron (waste treatment) | 0.00%          | 0.00%                   | 0.00%         | 0.00%          |
| Steel, low-alloyed               | 0.00%          | 0.00%                   | 0.00%         | 0.00%          |
| Waste reinforced concrete        | 0.45%          | 0.32%                   | 0.49%         | 0.22%          |

**Table S8.** Incidence of most-impacting processes (PCM-TES, PV).

| Process                          | Global Warming | Photochemical Oxidation | Acidification | Eutrophication |
|----------------------------------|----------------|-------------------------|---------------|----------------|
| Electricity, PV                  | 51.82%         | 58.93%                  | 51.72%        | 53.91%         |
| Heat pump                        | 17.11%         | 18.81%                  | 18.18%        | 22.20%         |
| Propylene glycol                 | 2.66%          | 4.24%                   | 1.78%         | 1.89%          |
| Gravel                           | 1.55%          | 1.67%                   | 1.47%         | 0.77%          |
| Polyethylene                     | 1.97%          | 2.01%                   | 1.06%         | 0.19%          |
| Concrete                         | 1.75%          | 0.74%                   | 0.80%         | 0.42%          |
| Sand                             | 0.77%          | 0.79%                   | 0.75%         | 0.36%          |
| Steel, chromium                  | 2.41%          | 2.57%                   | 2.05%         | 1.28%          |
| Reinforcing steel                | 0.65%          | 1.05%                   | 0.38%         | 0.38%          |
| Tube insulation                  | 0.66%          | 0.89%                   | 0.78%         | 0.33%          |
| Sealing tape                     | 0.31%          | 0.44%                   | 0.26%         | 0.18%          |
| Brass                            | 0.33%          | 1.72%                   | 2.09%         | 2.52%          |
| Excavation                       | 0.05%          | 0.03%                   | 0.06%         | 0.03%          |
| Tap water                        | 0.01%          | 0.01%                   | 0.01%         | 0.01%          |
| end-of-life concrete             | 0.00%          | 0.00%                   | 0.00%         | 0.00%          |
| end-of-life eps tank             | 0.00%          | 0.00%                   | 0.00%         | 0.00%          |
| end-of-life steel PCM            | 0.00%          | 0.00%                   | 0.00%         | 0.00%          |
| Electricity, grid                | 0.00%          | 0.00%                   | 0.00%         | 0.00%          |
| Paraffin                         | 15.82%         | 13.83%                  | 17.67%        | 6.29%          |
| PE                               | -0.24%         | -0.27%                  | -0.10%        | 0.01%          |
| Polystyrene                      | 1.49%          | 0.74%                   | 0.40%         | 0.16%          |
| Steel and iron (waste treatment) | -14.25%        | -31.33%                 | -9.31%        | -5.28%         |
| Steel, low-alloyed               | 15.13%         | 23.13%                  | 9.97%         | 14.36%         |
| Waste reinforced concrete        | 0.00%          | 0.00%                   | 0.00%         | 0.00%          |

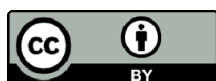

© 2020 by the authors. Submitted for possible open access publication under the terms and conditions of the Creative Commons Attribution (CC BY) license (<http://creativecommons.org/licenses/by/4.0/>).
